# Supplementary material for: Thrombomodulin gene polymorphism and the occurrence and prognostic value of sepsis acute kidney injury
Source: PubMed Central journal article supplement — Medicine (Baltimore). 2021 Jul 2;100(26):e26293. doi: 10.1097/MD.0000000000026293 (PMC8257907; doi:10.1097/md.0000000000026293), 2021-07-02

**Supplementary Figure 1** The genetic map having the relative locations of the *TH* gene rs1042580, rs1962 and rs3176123 SNPs sites and regulatory regions of *THBD* gene.

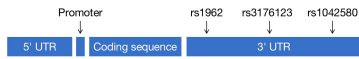

Supplement: medi-100-e26293-s001.pdf [file medi-100-e26293-s001.pdf]
